# Supplementary material for: Piezo-photocatalytic reduction of nitrates to N2 over silver dispersed on BaTiO3@TiO2
Source: Royal Society of Chemistry journal article supplement (doi:10.1039/d4cc01358a), 2024-01-01
Supplement: d4cc01358a1.pdf [file d4cc01358a1.pdf]

## ***Electronic Supplementary Information***

### **Piezo-photocatalytic reduction of nitrates to N<sub>2</sub> over silver dispersed on BaTiO<sub>3</sub>@TiO<sub>2</sub>**

Hongjie Luo,<sup>a</sup> Guoqiang Shu,<sup>a,c</sup> Shanhong Guo,<sup>a</sup> Xia Kuang,<sup>a</sup> Changming Zhao,<sup>c</sup> Chang-An Zhou,<sup>a</sup> Chao Wang,<sup>a</sup> Lei Song,<sup>a</sup> Kui Ma,<sup>\*a</sup> and Hairong Yue<sup>a,b</sup>

*a. Low-Carbon Technology and Chemical Reaction Engineering Laboratory, School of Chemical Engineering, Sichuan University, Chengdu 610065, China.*

*b. Institute of New Energy and Low-Carbon Technology, Sichuan University, Chengdu 610207, China.*

*c. Daqing Oilfield Production Technology Institute, Daqing 163453, China.*

\*Corresponding author: [kuima@scu.edu.cn](mailto:kuima@scu.edu.cn);

TEL/FAX: (+86) 28-85465318

## ***Supplementary Experimental Section***

### **1. Catalysts preparation**

*Synthesis of BTO nanoparticles.* BTO was synthesized using a sol-gel hydrothermal method. Initially, 5 mL of deionized water and 5 mL of ethanol were added to a 50 mL round-bottom flask containing 8.5 mL of titanium butoxide, followed by the addition of 4 mL of ammonia solution at 80°C under magnetic stirring. This resulting solution was labeled as Solution A. Simultaneously, 11.83 g of barium hydroxide octahydrate was dissolved in 35 mL of deionized water to form a homogeneous solution under magnetic stirring at 80°C, and this solution was labeled as Solution B. Next, Solution B was added to Solution A and vigorously stirred for 20 minutes at 80°C. The final suspension was transferred to a 100 mL Teflon-lined autoclave and maintained at 200°C for 24 hours. Afterward, it was cooled to room temperature. The resulting product was washed several times with DI water and ethanol, followed by drying in a 60°C oven for 10 hours.<sup>1</sup>

*Synthesis of BTO@TO core-shell material.* BTO@TO nanoparticles were synthesized using a simple chemical bath method. Firstly, 0.2 M boric acid and 0.075 M ammonium fluoride titanium completely dissolved in 100 mL of DI water. The previously synthesized BTO nanoparticles were added to this solution and stirred at 60°C for 20 minutes, 40 minutes, 60 minutes, 80 minutes, and 120 minutes, respectively. The resulting products were washed several times with DI water and ethanol, followed by drying in a 60°C oven for 10 hours. The dried products were then heated in a muffle furnace with a heating rate of 1°C/min and maintained at 350°C for 30 minutes to obtain the final products. Based on the chemical bath time, the final products were designated as BTO@TO-20, BTO@TO-40, BTO@TO-60, BTO@TO-80, and BTO@TO-120.

*Synthesis of Ag/BTO@TO.* Different deposition concentrations of Ag/BTO@TO catalysts were synthesized using a deposition-precipitation method. Initially, 0.3g of BTO@TO nanoparticles were dispersed in 80 mL of DI water and sonicated for 5

minutes. While continuously stirring, 20 mL of anhydrous methanol was added. Subsequently, 473  $\mu\text{L}$ , 1420  $\mu\text{L}$ , and 2367  $\mu\text{L}$  of 10 mg/mL  $\text{AgNO}_3$  solution were separately added. Next, the pH was adjusted to 10 by adding 0.1 mol/mL NaOH solution dropwise, followed by 10 minutes of sonication and 30 minutes of continuous stirring. The resulting products were washed several times with DI water and ethanol, then dried in a vacuum oven at 40°C for 10 hours. The final products were labeled as  $\text{Ag}_1/\text{BTO@TO}$ ,  $\text{Ag}_2/\text{BTO@TO}$ , and  $\text{Ag}_3/\text{BTO@TO}$ . The entire process was conducted in a dark environment.

## 2. Characterization

The X-ray diffraction (XRD) was tested by an XRD-6100 X-ray diffractometer (Shimadzu Corporation, Kyoto, Japan) with Cu–K $\alpha$  beam source in  $2\theta$  at 10–90° range. A JEM-F200 (JEOL, Tokyo, Japan) transmission electron microscopy (TEM) was used to gain the TEM and high-resolution TEM (HRTEM) images of catalysts. X-ray photoelectron spectroscopy (XPS) was characterized by a K-Alpha (Thermo Scientific, Waltham, MA, USA) photoelectron spectrometer to detect the chemical state of the catalysts, and the element binding energy was corrected using the C1s peak at 284.80 eV. The UV-vis diffuse-reflectance spectra (UV-vis DRS) of as-prepared samples was performed with a UV-3600i Plus (Shimadzu Corporation, Kyoto, Japan) spectrometer equipped with an integrating sphere by using  $\text{BaSO}_4$  as reference in the range of 200–800 nm. Photocurrent measurements were carried out on CHI 660E electrochemical workstation (Chenhua, Shanghai, China). A three-electrode battery made of nanostructured materials on FTO was used as the working electrode, and saturated Ag/AgCl and platinum electrodes were used as the counter electrode and reference electrode, respectively. The electrochemical impedance spectroscopy (EIS) tests were characterized over a  $10^{-2}$  to  $10^6$  Hz frequency range. The Electron spin resonance (ESR) spectra were obtained by MS-5000X (Magnettech, Berlin, Germany) to detect  $\cdot\text{CO}_2^-$ ,  $\cdot\text{OH}$  and  $\cdot\text{O}_2^-$  radicals using 5, 5-dimethyl-1-pyrroline-1-oxide (DMPO) as spin trap.

### 3. Catalyst activity testing

The prepared catalyst's piezo-photocatalytic activity was evaluated by the degradation of  $\text{NO}_3^-$  under the combined action of light and ultrasound. In this experiment, 50 mg of the catalyst was added to a 50 mL solution of  $\text{NaNO}_3$  in water (50 mg/L), along with 100  $\mu\text{L}$  of  $\text{HCOOH}$ . The mixture was stirred in the dark for 30 minutes to achieve adsorption-desorption equilibrium between the solvent and the catalyst. The reactor we used for catalytic activity testing is equipped with a circulation cooling water system to ensure the reactor and the solution temperatures maintain  $\sim 22\text{-}25\text{ }^\circ\text{C}$  during the testing. Before each testing, reactor was evacuated and purged with argon gas for three cycles. Then, the ultrasound with 20 kHz and a 300 W xenon lamp were turned on to initiate the catalytic reaction. At specific time intervals, 1 mL of the suspension was withdrawn, centrifuged, and the concentrations of the  $\text{NO}_3^-$ ,  $\text{NO}_2^-$ , and  $\text{NH}_4^+$  products were analyzed using the ion chromatography (CIC-D100, SHINE, China). Based on this, we used nitrogen balance method to calculate the  $\text{N}_2$  yield, which is generally accepted in photocatalytic nitrates reduction system. The corresponding calculation equations are described as follows:

$$X_{\text{NO}_3^-} = \frac{C_{\text{NO}_3^-} - C_{\text{NO}_3^-}}{C_{\text{NO}_3^-}} \times 100\% \quad (\text{eq. S1})$$

$$S_{\text{NO}_2^-} = \frac{C_{\text{NO}_2^-}}{C_{\text{NO}_3^-} - C_{\text{NO}_3^-}} \times 100\% \quad (\text{eq. S2})$$

$$S_{\text{NH}_4^+} = \frac{C_{\text{NH}_4^+}}{C_{\text{NO}_3^-} - C_{\text{NO}_3^-}} \times 100\% \quad (\text{eq. S3})$$

$$S_{\text{N}_2} = 1 - S_{\text{NO}_2^-} - S_{\text{NH}_4^+} \quad (\text{eq. S4})$$

Where  $C_i$  and  $C_t$  represent the concentration of nitrogen species at irradiation time 0 and t, respectively. In order to confirm  $\text{N}_2$  production, the gas phase product was collected and injected into a gas chromatograph (GC2060, Sanlikeji, China) to

detect N<sub>2</sub>.

#### 4. The formula for calculating the energy band structure

$$(\alpha h\nu)^{\frac{1}{n}} = B(h\nu - E_g) \quad (\text{eq. S5})$$

$$h\nu = 1240/\lambda \quad (\text{eq. S6})$$

$$E_g = E_{VB} - E_{CB} \quad (\text{eq. S7})$$

where  $E_g$  represents the energy band width of the semiconductor,  $\nu$  represents the frequency,  $h$  represents Planck's constant,  $B$  is a constant,  $\alpha$  represents the absorption coefficient,  $n$  represents the index associated with the semiconductor,  $\lambda$  represents the wavelength,  $E_{VB}$  represents the valence band position, and  $E_{CB}$  represents the conduction band position.

**Supplementary Figures**

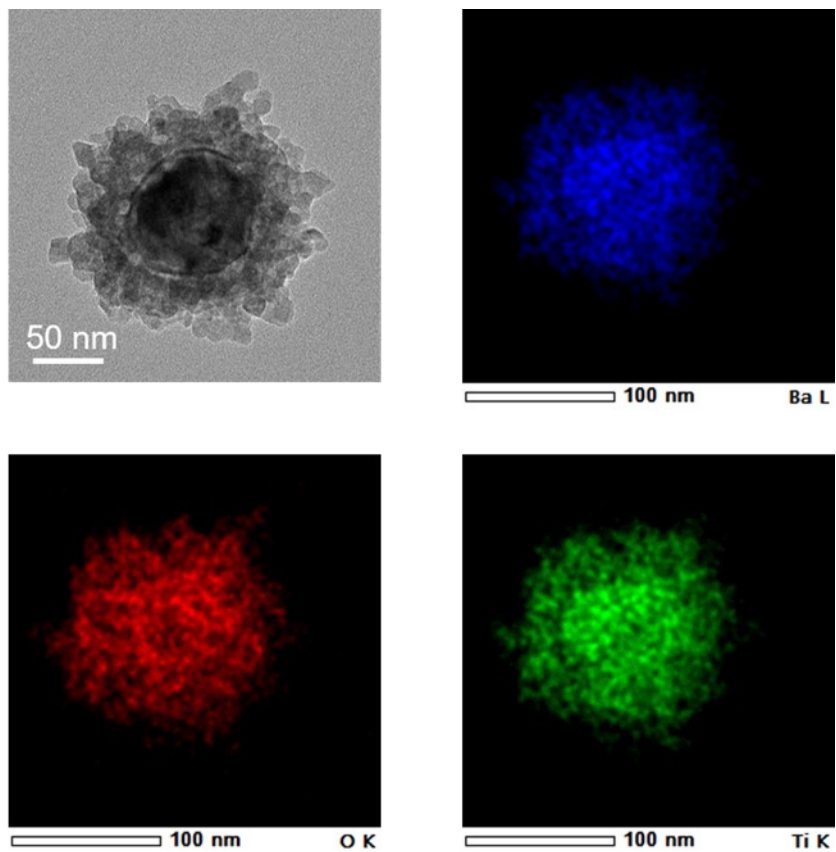

**Figure S1.** TEM-EDS elemental mapping of BTO@TO-40.

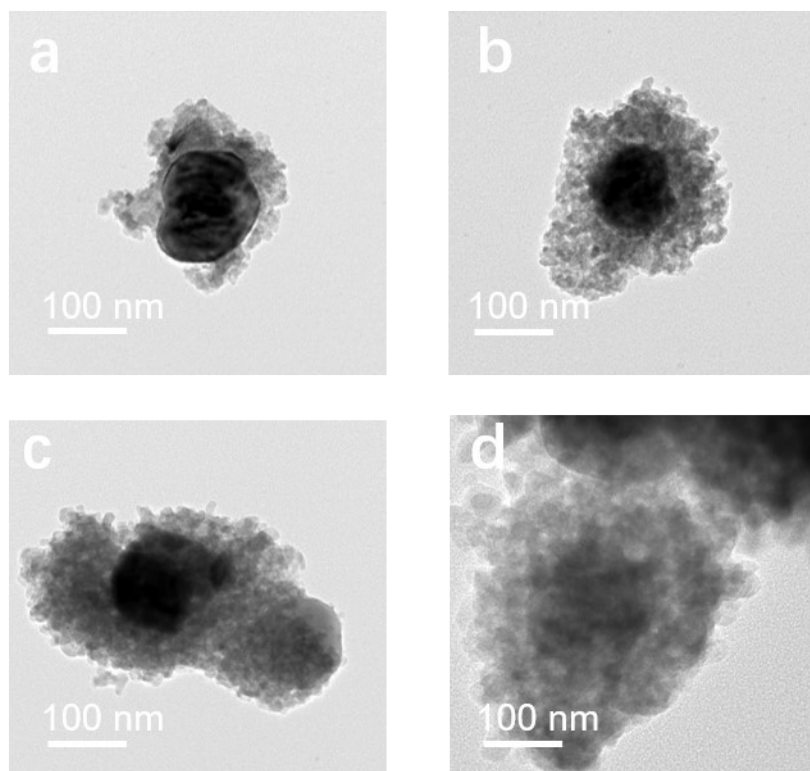

**Figure S2.** (a) TEM image of BTO@TO-20; (b) TEM image of BTO@TO-60; (c) TEM image of BTO@TO-80; (d) TEM image of BTO@TO-120.

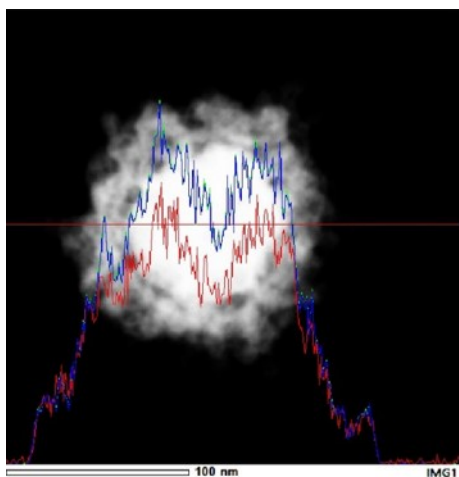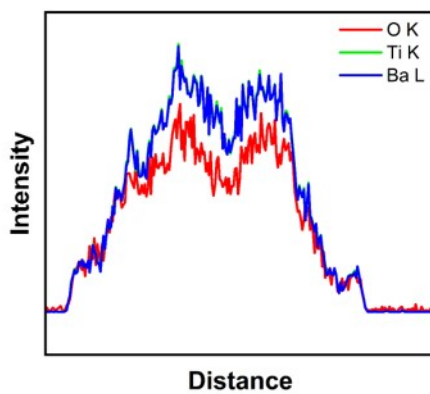

**Figure S3.** EDS line scan of BTO@TO-40.



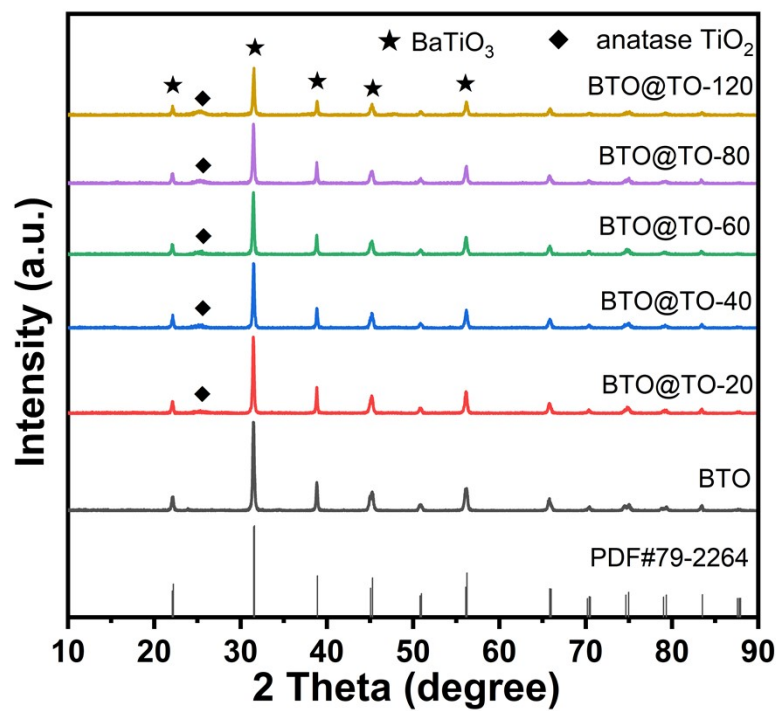

**Figure S4.** XRD spectra of BTO@TO with different chemical bath times.

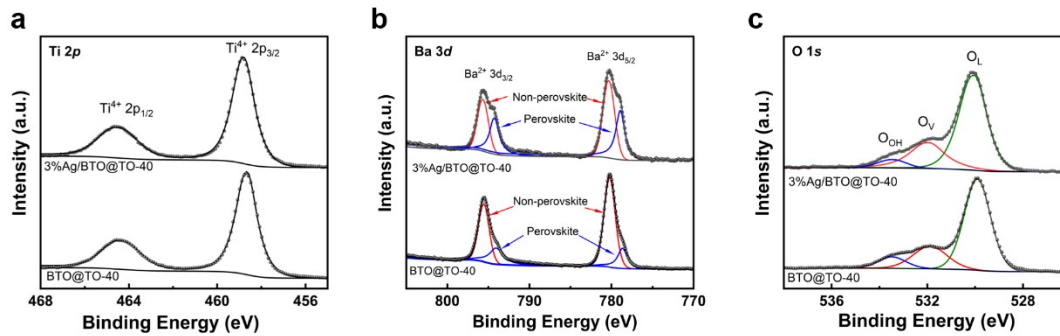

**Figure S5.** High-resolution XPS spectra of (a) Ti  $2p_{1/2}$  and Ti  $2p_{3/2}$ , (b) Ba  $3d_{5/2}$  and Ba  $3d_{3/2}$ , (c) O 1s in Ag<sub>2</sub>/BTO@TO-40.

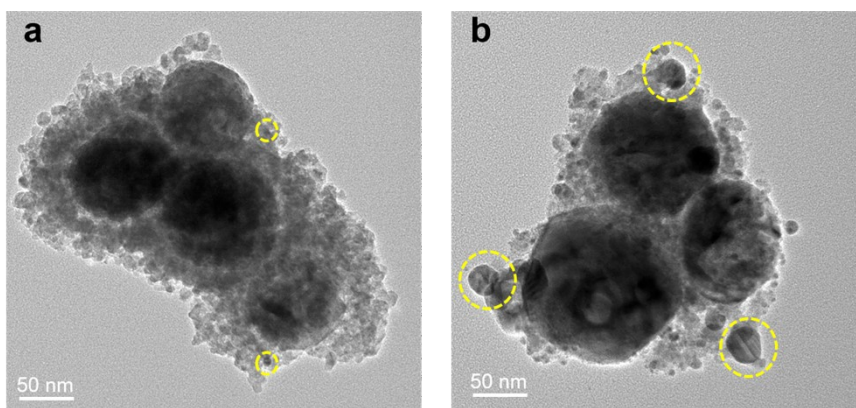

**Figure S6.** TEM images of (a)  $\text{Ag}_1/\text{BTO}@\text{TO-40}$  and (b)  $\text{Ag}_3/\text{BTO}@\text{TO-40}$ .

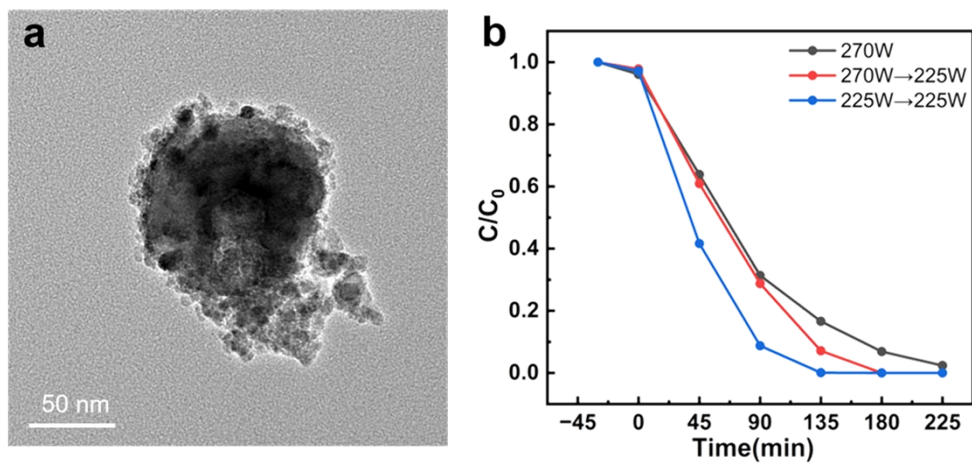

**Figure S7.** (a) TEM image of Ag<sub>2</sub>/BTO@TO-40 after the reaction at 270 W; (b) Piezophotocatalytic nitrates reduction activity of Ag<sub>2</sub>/BTO@TO-40 under the condition of resetting the ultrasonic power to 225 W from 270 W.

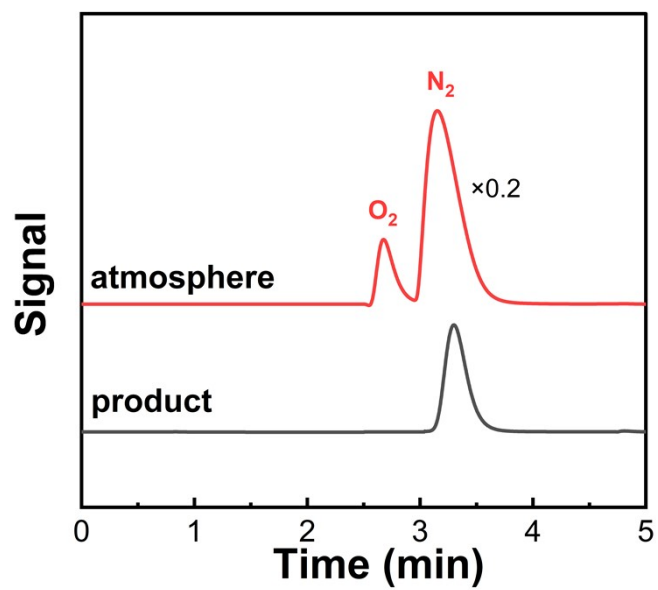

**Figure S8.** GC spectra of atmosphere and gas phase product of piezo-photocatalytic nitrates reduction over Ag<sub>2</sub>/BTO@TO-40.

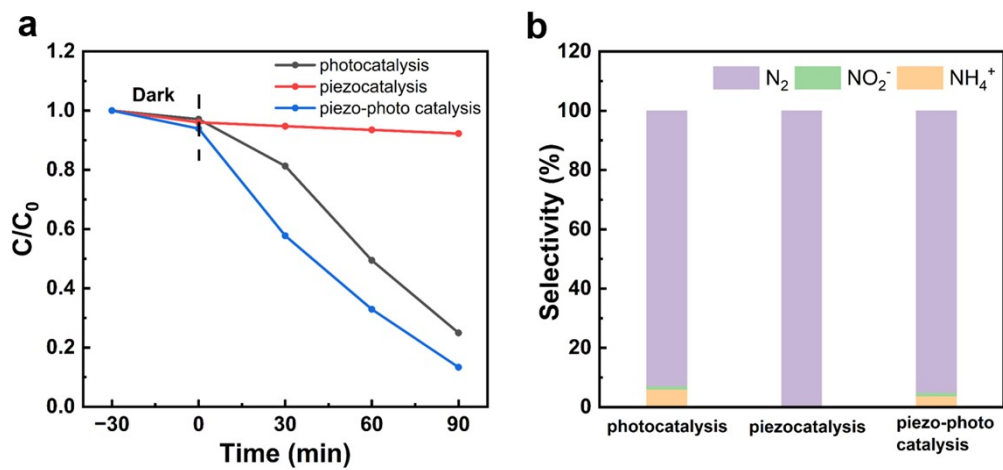

**Figure S9.** The photocatalytic, piezo-catalytic and piezo-photocatalytic (a) nitrates reduction activity and (b) the corresponding product selectivity over Ag<sub>2</sub>/BTO@TO-40.

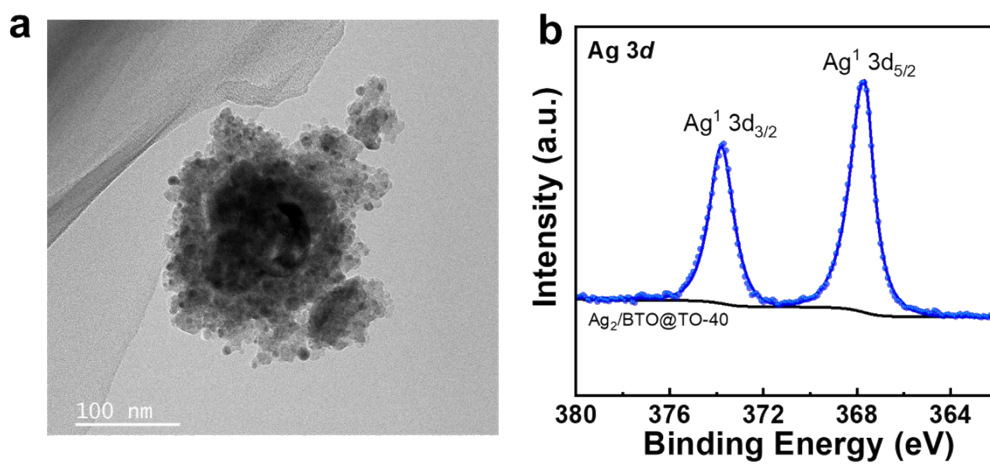

**Figure S10.** (a) TEM image and (b) Ag 3d XPS spectra of Ag<sub>2</sub>/BTO@TO-40 after cycling experiment.

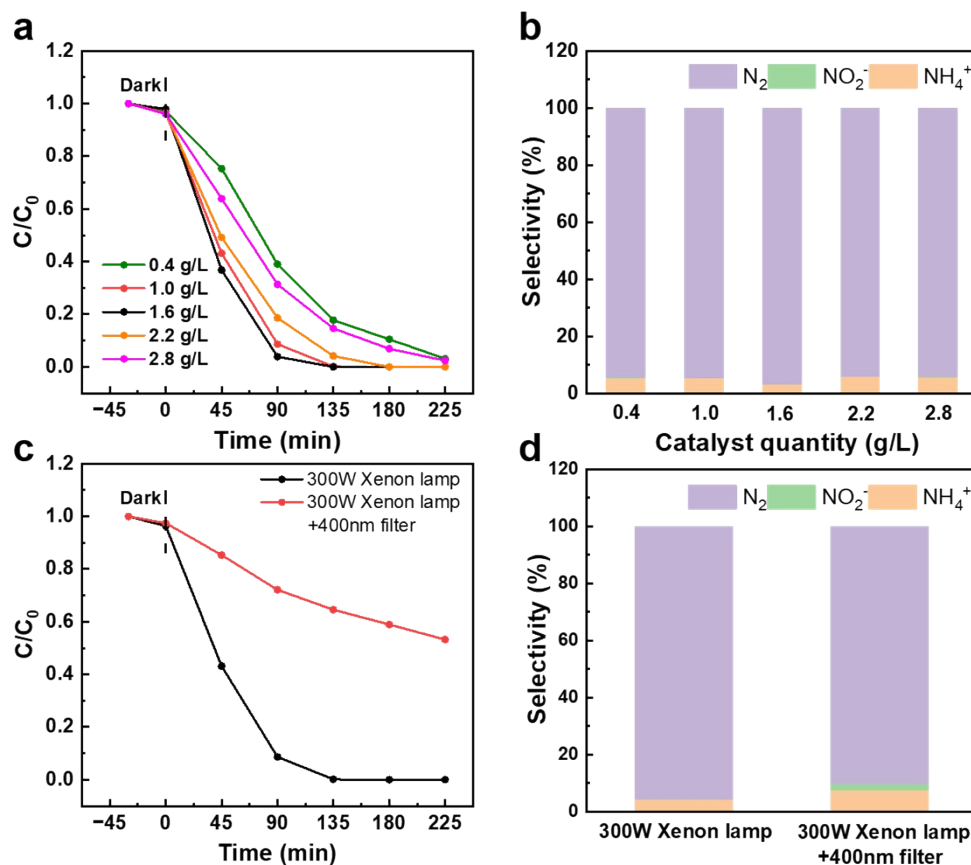

**Figure S11.** The effect of catalyst amount on piezo-photocatalytic activity (a) and products selectivity (b) over  $Ag_2/BTO@TO-40$ ; The effect of light source on piezo-photocatalytic activity (c) and products selectivity (d) over  $Ag_2/BTO@TO-40$ .



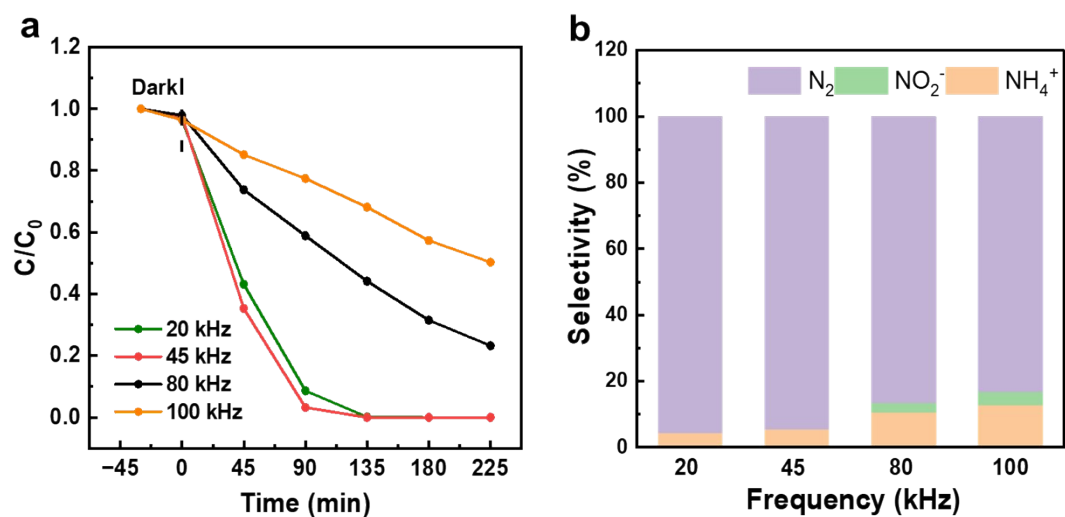

**Figure S12.** The effect of ultrasonic frequency on (a) piezo-photocatalytic activity and (b) products selectivity over  $Ag_2/BTO@TO-40$ .

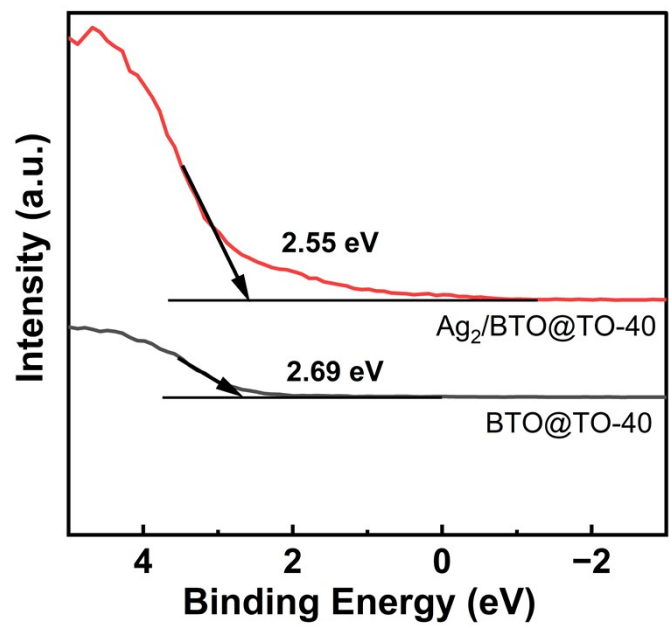

**Figure S13.** XPS-VB spectra of BTO@TO-40 and Ag<sub>2</sub>/ BTO@TO-40.

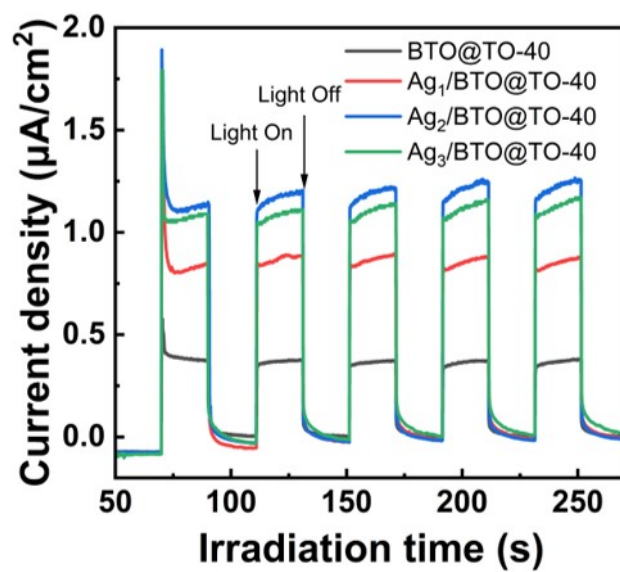

**Figure S14.** Photocurrent density curves for BTO@TO with different silver deposition.

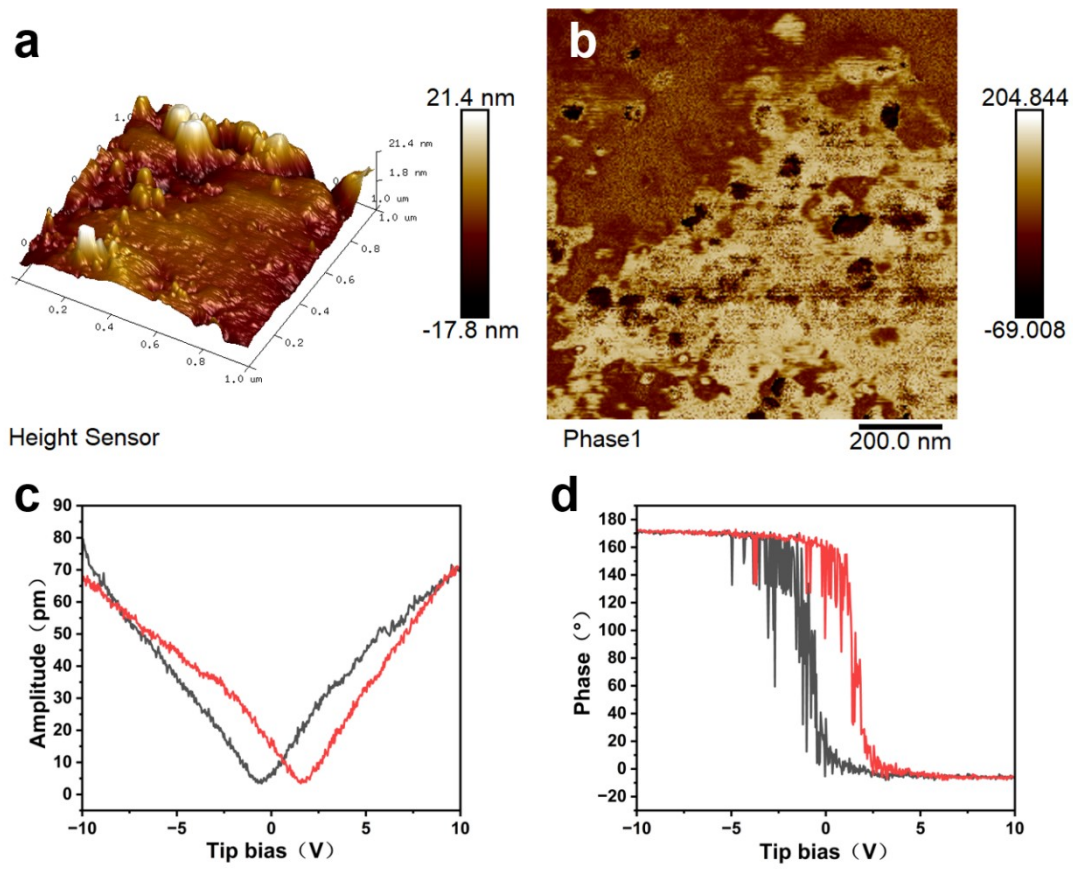

**Figure S15.** PFM tests of  $\text{Ag}_2/\text{BTO}@\text{TO-40}$ : (a) Topography image, (b) Phase image, (c) Amplitude butterfly loops and (d) Phase hysteresis loops.

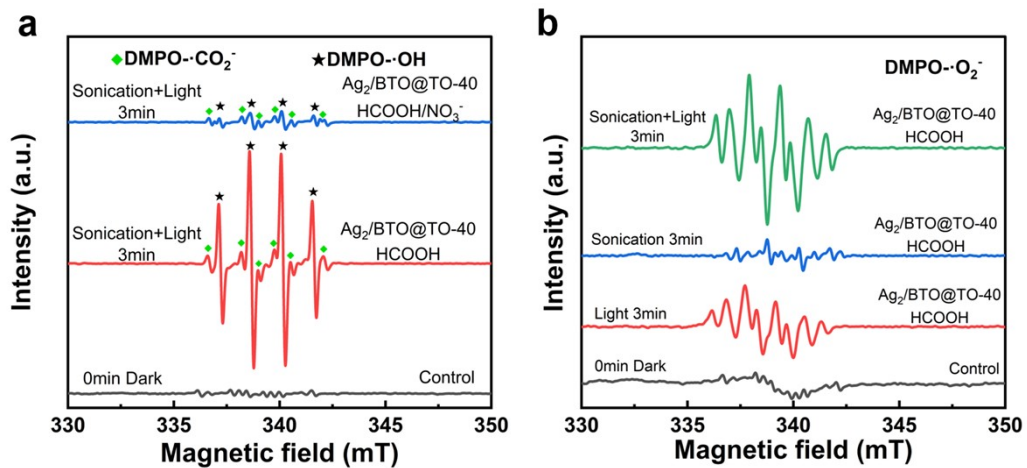

Figure S16. ESR spectra of  $\text{Ag}_2/\text{BTO}@/\text{TO}-40$ : (a)  $\bullet\text{CO}_2^-$  and  $\bullet\text{OH}$ , (b)  $\bullet\text{O}_2^-$ .

## Supplementary References

1. X. Huang, K. Wang, Y. Wang, B. Wang, L. Zhang, F. Gao, Y. Zhao, W. Feng, S. Zhang and P. Liu, *Appl. Catal. B Environ.*, 2018, **227**, 322-329.
